1 Running Title: TCR-MHC affinity defines CD8 T cells at infection site

2

3 **TCR-MHC Interaction Strength Defines Trafficking and**  
4 **Resident Memory Status of CD8 T cells in the Brain**

5

6

7 Anna Sanecka<sup>1#</sup>, Nagisa Yoshida<sup>1</sup>, Elizabeth Motunrayo Kolawole<sup>2</sup>, Harshil Patel<sup>3</sup>, Brian D.  
8 Evavold<sup>3</sup>, Eva-Maria Frickel<sup>1\*</sup>

9

10 <sup>1</sup>Host-*Toxoplasma* Interaction Laboratory, and <sup>3</sup>Bioinformatics and Biostatistics, The Francis  
11 Crick Institute, London, UK

12 <sup>2</sup>Division of Microbiology and Immunology, Department of Pathology, University of Utah,  
13 Salt Lake City, UT, USA

14 <sup>#</sup>Present address: Department of Immunology, Faculty of Biochemistry, Biophysics, and  
15 Biotechnology, Jagiellonian University, Krakow, Poland

16

17 \*Correspondance:

18 [eva.frickel@crick.ac.uk](mailto:eva.frickel@crick.ac.uk)

19

20

21

22

23 Word Count: 6310

24 Number of Figures: 5

25 Number of Tables: 1

26

27 **Abstract**

28

29 T cell receptor-Major histocompatibility complex (TCR-MHC) affinities span a wide range in  
30 a polyclonal T cell response, yet it is undefined how affinity shapes long-term properties of  
31 CD8 T cells during chronic infection with persistent antigen. Here, we investigate how the  
32 affinity of the TCR-MHC interaction shapes the phenotype of memory CD8 T cells in the  
33 chronically *Toxoplasma gondii*-infected brain. We employed CD8 T cells from three lines of  
34 transnuclear (TN) mice that harbour in their endogenous loci different T cell receptors specific  
35 for the same *Toxoplasma* antigenic epitope ROP7. The three TN CD8 T cell clones span a wide  
36 range of affinities to MHCI-ROP7. These three CD8 T cell clones have a distinct and fixed  
37 hierarchy in terms of effector function in response to the antigen measured as proliferation  
38 capacity, trafficking, T cell maintenance and memory formation. In particular, the T cell clone  
39 of lowest affinity does not home to the brain. The two higher affinity T cell clones show  
40 differences in establishing resident memory populations (CD103<sup>+</sup>) in the brain with the higher  
41 affinity clone persisting longer in the host during chronic infection. Transcriptional profiling  
42 of naïve and activated ROP7-specific CD8 T cells revealed that *Klf2* encoding a transcription  
43 factor that is known to be a negative marker for T cell trafficking is upregulated in the activated  
44 lowest affinity ROP7 clone. Our data thus suggest that TCR-MHC affinity dictates memory  
45 CD8 T cell fate at the site of infection.

46

47 **Keywords**

48 CD8 T cells, *Toxoplasma gondii*, neurological infection and inflammation, TCR-MHC  
49 interaction, ROP7

50

## 51 Introduction

52

53 CD8 T cells are a cornerstone of the adaptive immune defence to intracellular pathogens with  
54 their capacity to operate as antigen-experienced effector and memory cells. Pathogen-specific  
55 CD8 effector T cells rapidly expand and differentiate during the acute infection, followed by a  
56 phase of contraction and development of long-lived memory T cells (1,2). Most of our  
57 understanding of T cell responses to chronic infections is derived from models where pathogen  
58 control is incomplete and T cell become functionally impaired or exhausted over time (3,4).  
59 We thus lack knowledge of what drives long-lasting control of chronically persistent  
60 pathogens.

61

62 The interaction of the TCR with the pathogen antigenic epitope loaded on the MHC is essential  
63 in maintaining effective CD8 T cell control of persistent intracellular pathogens. The  $\alpha\beta$  TCR  
64 stochastically assembles and is selected during thymic development, and it is via this receptor  
65 that the immune system tunes the breath and strength of its response (2,5). Efforts have been  
66 made to elicit the effect of TCR-MHC affinity on the fate of the resulting T cells, however,  
67 often this relied on varying the antigenic peptide rather the TCR (2,6). The simple question of  
68 how T cells of different affinity to a given antigen fare during chronic infection remains  
69 unresolved.

70

71 In order to model a persistent chronic infection, we deemed a resistant mouse strain infected  
72 with the protozoan parasite *Toxoplasma gondii* to be most suitable. *Toxoplasma* is the most  
73 common parasitic infection in man, whereby in immunocompetent hosts the acute phase of  
74 infection is generally asymptomatic and proceeds to the chronic phase, which is incurable and  
75 defined by tissue cyst formation preferably in the brain. The parasite poses a serious health  
76 threat to immunocompromised individuals, especially AIDS patients. It is unclear how  
77 *Toxoplasma* maintains the intricate balance between survival and host defence. CD8 T cells  
78 and their ability to produce  $\text{IFN}\gamma$  have been shown to secure the latency of the parasitic  
79 infection (7,8).

80

81 Mice harbouring the MHC I allele H-2L<sup>d</sup> (e.g. BALB/c) control *Toxoplasma* infection due to  
82 an immunodominant epitope derived from the GRA6 parasite protein (9–11). BALB/c mice  
83 exhibit very few tissue brain cysts and the functionality of their CD8 T cells in the *Toxoplasma*-  
84 infected brain is defined by their capacity to produce  $\text{IFN}\gamma$  and perforin (7,12,13). Recently,  
85 using the murine BALB/c chronic *Toxoplasma* model, a T cell population ( $T_{\text{int}}$ ) in an  
86 intermediate state between effector and memory status was discovered, highlighting the value  
87 of this model for defining the fate of CD8 T cells during chronic infection with persistent  
88 antigen (14).

89

90 In addition to memory T-cell populations, distinct memory T-cell population that persist long  
91 term within non-lymphoid tissue have recently been documented and are resident in nature,  
92 self-renewing, and highly protective against subsequent infections (15,16). These are termed  
93 resident memory T cells ( $T_{\text{RM}}$ ) and can be identified by CD103 expression (17,18). Most  $T_{\text{RM}}$   
94 cells to date have been characterised in mucosal tissue sites, where they are rapidly active  
95 against secondary infections (19–21). Much less is known about  $T_{\text{RM}}$  in the CNS. Viral models  
96 have defined CD8  $T_{\text{RM}}$  in VSV encephalitis and in inoculation with LCMV (15,20–22). In a  
97 susceptible C57BL/6 model of *Toxoplasma* infection, a transcriptionally defined resident  
98 memory CD8 population was recently defined in the brain (23). Again, prerequisites in terms  
99 of TCR-MHC affinity for the transition of CD8 T cells to a  $T_{\text{RM}}$  phenotype are completely  
100 unexplored.

101  
102  
103  
104  
105  
106  
107  
108  
109

Rather than varying the antigenic peptide, we sought to use distinct clonal T cells. In order to answer how TCR-MHC affinity dictates trafficking and phenotype of memory CD8 T cells in the brain during chronic infection, we employed three distinct clonal CD8 T cells, each expressing a natural TCR recognizing the *Toxoplasma* antigen ROP7 (24,25). These cells were obtained from transnuclear (TN) mice generated by somatic cell nuclear transfer from a nucleus of a *Toxoplasma* antigen-specific CD8 T cell and have different affinity for MHC class I loaded with the same ROP7 peptide (24,25).

110  
111  
112  
113  
114  
115  
116  
117  
118  
119  
120  
121  
122

Here we report that TCR-MHC affinity dictates the potential of a CD8 T cells to home to the *Toxoplasma*-infected brain. We employed three natural CD8 T cell clones derived from a resolving *Toxoplasma* infection by somatic cell nuclear transfer, defined to possess different affinities for the same *Toxoplasma* antigen ROP7 (24,25). The two T cell clones with higher affinity, R7-I and R7-III were found in the brain during chronic infection, while the lowest affinity clone R7-II was not, despite all three clones being activated during the acute phase of infection. As possible causes for this divergent homing we observed high expression of the negative regulator of T cell activation Klf2 and its regulated genes in peptide-activated R7-II T cells. Additionally, Ctla4, a negative regulator of T cell responses was also upregulated on R7-II T cells. The highest affinity clone, R7-I, persisted longer during the chronic phase of infection than R7-III and was able to generate more T<sub>RM</sub> cells in the brain. Thus, our results indicate that higher affinity of the TCR-MHC interaction is better for trafficking and persisting of the specific CD8 T cells at the site of chronic infection, here brain.

## 123 **Materials and Methods**

124

### 125 ***Mice***

126 Thy1.1 (BALB/c N4; CD90.1<sup>+</sup>) and transnuclear (TN) R7-I, -II and -III mice on a Rag2  
127 proficient BALB/c (Rag2<sup>+/+</sup> CD90.2<sup>+</sup>) background were housed and bred in the animal facility  
128 of the Francis Crick Institute (Mill Hill Laboratory, London, UK) (24). All experiments were  
129 performed in accordance with the Animals (Scientific Procedures) Act 1986.

130

### 131 ***Calcium flux assay***

132 For calcium flux measurements lymphocytes from lymph nodes of R7-I, II or III mice were  
133 isolated and loaded with Indo-1 dye (Life Technologies) at concentration of 2mg/ml in IMDM  
134 media containing 5% FCS for 40 minutes at 37°C. Subsequently cells were washed 2 times  
135 with IMDM media and stained with anti-CD8 (53-6.7), anti-CD4 (GK1.5) and anti-CD3  
136 (17A2) antibodies all from Biolegend (San Diego, CA) for 20 min at room temperature.  
137 Lymphocytes were then stimulated by addition of ROP7-MHCI dextramer (Immudex) or by  
138 addition of Ionomycin (10 ng/ml).

139

### 140 ***ERK1/2 phosphorylation assay***

141 For the ERK1/2 phosphorylation assay lymphocytes from lymph nodes of R7-I, II or III mice  
142 were isolated and stained with anti-CD8 (5H10, Invitrogen) and anti-CD4 (GK1.5, Biolegend)  
143 antibodies. Splenocytes loaded with ROP7 peptide were used as stimulators. Lymphocytes  
144 were then stimulated by addition of splenocytes and incubated for 0, 1, 2, 4, 8, 12 min at 37°C.  
145 At the indicated time points, cells were fixed with paraformaldehyde at a final concentration  
146 of 2%. Cells were permeabilised by addition of ice-cold 90% methanol and stored over night  
147 at -20°C. Next, cells were washed and stained with anti-pERK1/2 (pT202/pY204) (20A, BD  
148 Biosciences) and acquired using an LSR II flow cytometer. Data were analysed using Flow Jo  
149 and Prism software.

150

### 151 ***In vitro proliferation assay***

152 Splenocytes of R7-I, II and III mice were isolated, stained with the intracellular fluorescent dye  
153 carboxyfluorescein diacetate succinimidyl ester (CFSE; 5µM; Life Technologies) for 5 minutes  
154 at room temperature and plated in 96-well plates. ROP7 peptide was added in the range of  
155 concentrations from 0.5x10<sup>-4</sup> to 0.5x10<sup>-9</sup> M. Three days later cells were harvested and stained  
156 for FACS analysis.

157

### 158 ***T cell adoptive transfer and infections***

159 Lymph nodes and spleens from TN ROP7 donor mice were harvested and the released cells  
160 negatively selected for CD8 T cells. Recipient Thy1.1 (BALB/c) mice received 10<sup>6</sup> ROP7<sup>+</sup> CD8  
161 T cells via i.v. injection prior to infection. Mice were infected orally with 5 cysts of the ME49  
162 *Toxoplasma* strain. Cells were harvested at the indicated time points during the acute and  
163 chronic phases of infection and processed accordingly.

164

### 165 ***Isolation of brain mononuclear cells***

166 Isolation of brain mononuclear cells was performed as described before (26). Briefly, mice  
167 were perfused with cold PBS and brains were isolated and homogenised. Brain cell suspension  
168 was diluted to 30% with isotonic Percoll solution and layered on top of 70% isotonic Percoll  
169 solution. Gradients were spun for 30 min at 500 x g, 18°C. Mononuclear cell population was  
170 collected from the interphase of Percoll gradient, washed and resuspended for antibody staining  
171 or restimulation.

172

173 ***In vivo proliferation assay***

174 ROP7 CD8 T cells were prepared as described. Prior to subcutaneous injection into recipient  
175 mice, cells were stained with CFSE (5 $\mu$ M). Mice were then infected orally as described.  
176 Spleen, LN and mLN tissues were then harvested 6/7 days post-infection and processed  
177 accordingly.

178

179 ***Ex vivo functional assay***

180 Cells harvested from mice 3 weeks post infection (weeks p.i.) were cultured *ex vivo* as a cell  
181 suspension for 2 hours with Ionomycin (20 ng/ml) and PMA (1  $\mu$ g/ml) after which Brefeldin  
182 A (2  $\mu$ g/ml) was added for the next 2 hours in RPMI media. Cells were then stained for flow  
183 cytometry and analysed as described.

184

185 ***Micropipette 2-dimensional adhesion frequency assay***

186

187 The two dimensional affinities were measured by micropipette adhesion frequency assay (27).  
188 CD8 T cells were negatively selected by magnetic cell sorting (Milteney) from spleen and  
189 lymph nodes of TN ROP7 mice. Human red blood cells RBCs were isolated in accordance with  
190 the Institutional Review Board at Emory University and used as the surrogate APC sensor  
191 through incorporation of ROP7 monomers with mouse b<sub>2</sub>-microglobulin (National Institutes  
192 of Health Tetramer Core) via biotin:streptavidin interactions. RBCs were coated with Biotin-  
193 X-NHS (EMD, Millipore) and 0.5 mg/ml streptavidin (Thermo Fisher Scientific) and 1–2 mg  
194 of the monomer antigenic and control monomers. Monoclonal cells were brought into contact  
195 50 times with pMHC coated RBC's with the same contact time and area ( $A_c$ ), and the adhesion  
196 frequency ( $P_a$ ) was calculated. Quantification of binding events along with TCR and p-MHC  
197 surface densities and adhesion frequencies along with two dimensional affinity were as  
198 described (27,28).

199

200 ***Antibodies***

201 Fluorescently labelled antibodies against CD3, CD90.1, CD90.2, CD62L, CD127, CD103,  
202 KLRG1, PD1 antigens and IFN $\gamma$  were purchased from Biolegend (San Diego, US).  
203 Fluorescently labelled antibodies against CD8 (5H10) alpha and anti-CD69 were purchased  
204 from Life Technologies (Carlsbad, US). H-2L<sup>d</sup> monomers with IPANAGRFF or photo-  
205 cleavable peptide (YPNVNI(Apn)NF) were obtained from the NIH Tetramer Core Facility  
206 (Emory University, Atlanta, US) and were tetramerised and peptide-exchanged as described  
207 previously {Frickel:2008ex}[50]{Frickel:2008ex}. All peptides were synthesised by  
208 Pepceuticals (Leicestershire, UK).

209

210 ***Flow cytometry***

211 Single-cell suspensions were prepared from brain, spleen, lymph nodes (LN) and mesenteric  
212 LN (mLN) by mechanical disruption. Brain mononuclear cells were isolated as described  
213 above (26). Cell were stained for 20 min at 4°C in an appropriate antibody cocktail and washed  
214 with PBS with 1% BSA. BD Cytotfix/Cytoperm kit was used for intracellular staining of cells.  
215 Cells were run on a BD LSRII or BD Fortessa X20 and analysed using FlowJo software (Tree  
216 Star).

217

218 ***Chimeras***

219 Recipient BALB/c mice (CD90.1) were treated with an intraperitoneal injection of  
220 myeloablative agent Busulfan (10 mg/kg) and injected with a congenic (CD90.2) donor bone  
221 marrow (BM) from ROP7 transnuclear mice one day after to create bone marrow chimeras. 6

222 to 8 weeks after BM transplantation chimerism was assessed in the blood and mice were  
223 infected orally with 5 cysts of *Toxoplasma* ME49.

224

### 225 ***RNASeq analysis***

226 Single-cell suspensions of splenocytes from R7-I, -II or -III mice were incubated in RPMI  
227 medium 1640 supplemented with recombinant mouse IL-2 (10 ng/ml) overnight at 37°C with  
228 or without ROP7 peptide (10 µM). Cells were stained with live/dead, anti-CD3, anti-CD8a and  
229 ROP7 tetramer. Live CD8<sup>+</sup> tetramer<sup>-</sup> T cells were sorted on the Aria, XDP and Influx 1 cell  
230 sorters. Samples were maintained at 4°C and purity determined to be 90-95%. RNA was  
231 isolated using Trizol and the RNeasy Micro-Kit (Qiagen). A total of 200 ng of RNA was used  
232 to prepare the RNA library using TruSeq mRNA Library Prep Kit v2 (Illumina) according to  
233 the manufacturer's recommendations. RNA sequencing was performed on the Illumina HiSeq  
234 2500 and typically generated ~25 million 100bp non-strand-specific single-end reads per  
235 sample. The RSEM package (version 1.2.11) (29) was used for the alignment and subsequent  
236 gene-level counting of the sequenced reads relative to mm10 RefSeq genes downloaded from  
237 the UCSC Table Browser (30) on 27<sup>th</sup> May 2015. Differential expression analysis between the  
238 triplicate groups was performed with DESeq2 (version 1.8.1) (31) after removal of genes with  
239 a maximum transcript per million (TPM) value of 1 across all samples in the experiment.  
240 Significant expression differences were identified at an FDR threshold of 0.01. Gene set  
241 enrichment analysis was performed by Gene Ontology Biological processes using GeneGo  
242 MetaCore (<https://portal.genego.com/>). Pathway analysis was performed using IPA software  
243 to demonstrate the biological effect of differentially expressed genes on cell cycle progression.

244

### 245 ***Real-Time PCR***

246 RNA was extracted from ROP7-specific splenocytes, either straight from the spleen, or  
247 incubated overnight with or without ROP7 peptide using RNeasy Mini and Micro Kits  
248 (Qiagen). cDNA was synthesised using the Maxima first strand cDNA synthesis kit for RT-  
249 qPCR, with dsDNase (Thermo Scientific).

250 Quantitative real-time PCR was performed using Maxima SYBR Green/Rox qPCR master mix  
251 (Thermo Scientific).

252 Results were normalised to the expression of CD8. Relative fold change was calculated by  
253 normalising to the average of R7-I, R7-II or R7-III biological triplicates respectively (straight  
254 from the spleen)

255 Primers used were as follows: KLF2 forward 5'- TGTGAGAAATGCCTTTGAGTTTACTG-  
256 3', reverse 5'- CCCTTATAGAAATACAATCGGTCATAGTC-3', CXCR3 forward 5'-  
257 GCCAAGCCATGTACCTTGAG-3', reverse 5'- GTCAGAGAAGTCGCTCTCG-3', Sell  
258 forward 5'- ACGGGCCCCAGTGTCAGTATGTG-3', reverse 5'-  
259 TGAGAAATGCCAGCCCCGAGAA-3', S1P1 forward 5'-  
260 GTGTAGACCCAGAGTCCTGCG-3', reverse 5'- AGCTTTTCCTTGGCTGGAGAG-3', IL-  
261 6Rα forward 5'- GTCACGGGCACTCCTTGGATAG-3', reverse 5'-  
262 AGGAATGTGGGCAGGGACATGG-3', Itag4 forward 5'-  
263 GATGCTGTTGTTGTACTIONCGGG-3', reverse 5'- ACCACTGAGGCATTAGAGAGC-  
264 3', CXCR4 forward 5'- GACTGGCATAGTCGGCAATG-3', reverse 5'-  
265 AGAAGGGGAGTGTGATGACAAA-3', IL-7Rα forward 5'-  
266 GCGGACGATCACTCCTTCTG-3', reverse 5'- GCATTTCACTCGTAAAAGAGCCC-3',  
267 CD8 forward 5'- GATATAAATCTCCTGTCTGCCATC-3', reverse 5'-  
268 ATTCATACCACTTGCTTCCTTGC-3'.

269

### 270 ***Statistical analyses***

271 GraphPad software (Prism) was used to perform statistical tests. Comparisons between two  
272 groups were made using Student's t test. Comparisons between multiple groups were made  
273 using one-way analysis of variance (ANOVA) test. Levels of significance are denoted as  
274 follows: \*  $p \leq 0.05$ , \*\*  $p \leq 0.01$ , \*\*\*  $p \leq 0.001$ , \*\*\*\*  $p \leq 0.0001$ . Non-significant results are  
275 either not marked or indicated as NS.



## 276 **Results**

277

### 278 **Three CD8 T cell clones specific for the same peptide respond differently to in vitro TCR** 279 **stimulation with cognate antigen**

280 We previously described transnuclear mouse lines (24), which we used herein as a source of  
281 three CD8 T cell clones specific for the same peptide (IPAAAGRFF) derived from the ROP7  
282 protein of *Toxoplasma gondii*. We refer to these CD8 T cell clones as R7-I, R7-II and R7-III  
283 CD8 T cells (24). We previously showed these CD8 T cell clones to differ in their TCR 3D  
284 affinity to cognate ROP7 peptide, with R7-I being the strongest binder at 4  $\mu\text{M}$  and R7-II the  
285 weakest at 109  $\mu\text{M}$ . R7-III has a binding affinity of 24  $\mu\text{M}$  (25). To further define the kinetics  
286 of TCR signalling after stimulation with ROP7 peptide, we measured ER-driven calcium  
287 release, phosphorylation of ERK1/2 kinase and cell proliferation as determinants of TCR  
288 reactivity. Both the calcium release and phosphorylation assays reflected the hierarchy of the  
289 TCR-MHC binding 3D affinity and were the fastest and strongest in R7-I CD8 T cells, while  
290 the R7-II CD8 T cell response was lowest (Fig 1A and B). Additionally, we noted that R7-II  
291 CD8 T cells had a basal level of free intracellular calcium that was higher than that of R7-I and  
292 R7-III CD8 T cells (Fig 1A). In the *in vitro* proliferation assay R7-II CD8 T cells were not able  
293 to proliferate efficiently even at the highest (500  $\mu\text{M}$ ) concentration of ROP7 peptide loaded  
294 onto splenocytes while R7-I and R7-III CD8 T cells reached the highest division index at  
295 concentrations 5  $\mu\text{M}$  and 0.5  $\mu\text{M}$  respectively (Fig. 1C). These *in vitro* experiments suggest  
296 that the 3D surface plasmon resonance affinity of the TCR-MHC binding reflects the strength  
297 of downstream signalling and partially translates to proliferation capacity *in vitro*.

298

299 To provide additional insight into the functional response of the three R7 CD8 T cell clones  
300 during *Toxoplasma* infection, we determined their 2D affinity for the ROP7 antigen. The  
301 micropipette adhesion frequency assay provides 2D based measures of TCR affinity for pMHC  
302 in a context that is membrane anchored. 2D affinity correlate more closely to functional  
303 responses than do 3D affinity measurements whose measurements are based on purified  
304 proteins. Over 40 T cells for each clone were analysed to reveal similar high affinities for R7-  
305 I and R7-III (geometric means being 1.38E-04 and 1.27E-04 respectively) and that R7-I whilst  
306 having a similar affinity to R7-III (Fig 1D) has a higher adhesion frequency than R7-III (Fig  
307 1E) that being 0.91 and 0.81 respectively. R7-II had a 3-fold lower 2D affinity (7.01E-05). The  
308 3-fold difference in affinity is functionally relevant as previously, we have demonstrated that  
309 during Polyoma infection CD8 T cells with the highest 2D affinity are found in the CNS and  
310 eventually comprise the  $T_{RM}$  population (32). In addition, we have reported CD4 T cells  
311 mediating EAE carry a 2-fold higher affinity as compared to the peripheral T cells (33).

312

### 313 **All three clones of R7 CD8 T cells are efficiently primed in the acute phase of Toxoplasma** 314 **infection**

315 Next, we sought to verify if these differences observed *in vitro* would still hold true *in vivo*. R7  
316 CD8 T cells were adoptively transferred into congenic naïve recipient mice (CD90.1 BALB/c).  
317 Subsequently, mice were orally infected with ME49 *Toxoplasma* tissue cysts. The donor R7  
318 CD8 T cells could then be followed during the acute and chronic phase of infection (Fig. 2A).  
319 We were able to observe proliferated cells for all three R7 clones in the mLN earliest 6 days  
320 post infection (p.i.) (Fig. 2B). Limited number of R7-II donor cells could be found in the mLN.  
321 However, those that were recovered from mLN had low CFSE level indicating that they had  
322 proliferated similarly to R7-I and R7-III CD8 T cells. Additionally, the R7 donor CD8 T cells  
323 were all activated to the same extent based on CD69 expression (Fig. 2B). We conclude that  
324 all three R7 clones are responsive to a *Toxoplasma* infection *in vivo*, as measured by  
325 proliferation and activation status.

326

327 **R7-II CD8 T cells do not persist and do not reach the brain of recipient mice during**  
328 **Toxoplasma infection**

329 Cysts in the brain characterise the chronic phase of *Toxoplasma* infection. IFN $\gamma$  produced by  
330 CD8 T cells is crucial for the maintenance of the quiescent cyst form of *Toxoplasma* (8,13).  
331 We showed that the three R7 CD8 T cell clones could be primed and proliferated in the acute  
332 phase of *Toxoplasma* infection. Next, we investigated if R7 CD8 T cells could be found in the  
333 brain in the chronic phase of *Toxoplasma* infection. We analysed brain, spleen, mLN and non-  
334 draining LN for the presence of transferred R7 CD8 T cells 3 weeks p.i.. R7-I and R7-III CD8  
335 T cells were found in significant numbers in the brain at 3 weeks p.i. (Fig. 3A). Percentages  
336 and absolute numbers of donor R7 CD8 T cells of all CD8 T cells in a given organ were  
337 different depending on the clone (Fig. 3A). The R7-II clone was found in insignificant  
338 percentages and numbers in all tested organs. R7-I and R7-III clones were present in higher  
339 percentages from 2-15% of all CD8 T cells depending on the organ. There was no significant  
340 difference between percentages of the R7-I and R7-III clone in the brain. In the spleen and  
341 mLN we observed significantly higher percentages of the R7-III CD8 T cells. We also  
342 determined absolute cell number for each clone at each site and did not observe significant  
343 differences between the R7-I and R7-III clone (Fig. 3A right panel).

344

345 We analysed earlier time points to estimate the time when donor cells reached the brain and to  
346 assess if there is a difference in donor cell number or percentages in the acute phase of  
347 infection. R7-I and R7-III CD8 T cells were observed in the brain as early as 10 days p.i.,  
348 however, we failed to detect a distinct R7-II CD8 T cell population in the brain (Fig. 3B). R7-  
349 II CD8 T cells could not be observed in prominent numbers in any of the tested primary and  
350 secondary lymphoid organs suggesting a lack of proper expansion and homing of the  
351 transferred population to the brain (Fig. 3B and Fig. S1A). R7-I and R7-III CD8 T cells were  
352 a major part (60-80%) of the total CD8 T cell population in the brain at day 10 p.i.. Their  
353 percentages decreased throughout time while host CD8 T cells reached the brain suggesting  
354 that the transferred T cell clones had a head start compared to newly formed *Toxoplasma*-  
355 specific CD8 T cells of the host. There were no significant differences in percentages or  
356 numbers of donor population between R7-I and R7-III CD8 T cells at day 10 or 2 weeks p.i.  
357 (Fig. 3B and Fig. S1A).

358

359 To dissect the reasons for the poor expansion and lack of R7-II cells in the brain we compared  
360 the transcriptional profiles of *in vitro* ROP7-activated R7-II vs R7-I or R7-III cells. In the list  
361 of the top 10 genes upregulated in R7-II (Table 1) we found *Klf2* encoding a transcription factor  
362 that is known to be important for T cell trafficking between the blood and lymphoid organs  
363 (34–36). *Klf2* is highly expressed in naïve and memory T cells but downregulated in effector  
364 T cells upon binding of the TCR to its cognate peptide (37). The stronger the binding affinity,  
365 the lower the expression of *Klf2* and the better the activation of the T cells (38). Additionally,  
366 *S1pr1* which is regulated by *Klf2* was also in the top 10 upregulated genes. We analysed the  
367 expression of *Klf2* across the unstimulated and activated samples of the RNASeq experiment  
368 (Fig. 3C, left graph) as well as at the genes known to be regulated by *Klf2* such as *CXCR3*, *Sell*  
369 (*CD62L*), *S1pr1*, *Itga4*, *CXCR4*, *Il7ra*, *Il6ra* (Fig. 3C, right graph). *Klf2* expression was at  
370 similar level in all three naïve CD8 T cell clones. After activation, all three clones  
371 downregulated *Klf2* however downregulation in R7-II was the weakest reflecting the lowest  
372 binding affinity of Rop7 peptide to R7-II. Expression of *Sell* (*CD62L*), *S1pr1*, *Itga4*, *CXCR4*,  
373 *Il7ra*, *Il6ra* mirrored *Klf2* expression being highest in R7-II and was comparable between R7-  
374 I and R7-III. On the other hand, *CXCR3* expression was lowest in R7-II. We performed an  
375 independent *in vitro* activation experiment and confirmed by qRT-PCR the RNAseq results

376 observed (Fig. 3D). mRNA expression detected by qRT-PCR correlated with the RNAseq data  
377 for all tested genes besides the *CXCR3* gene.

378

379 CTLA4 is known as a negative regulator of T cell responses. We analysed the expression of  
380 the *Ctla4* transcript in the RNASeq of activated ROP7 CD8 T cells as its high expression in  
381 R7-II cells could explain their poor performance. As expected, we observed the highest  
382 expression of *Ctla4* in R7-II CD8 T cells in comparison with the two other R7 clones (Fig. 3E,  
383 left graph). We could confirm the RNAseq data in an *in vivo* experiment, where R7 T cells  
384 were adoptively transferred to congenic mice and analysed in LNs 5 days after infection with  
385 *Toxoplasma*. CTLA4 surface expression determined by FACS in R7-II cells was highest in  
386 comparison to R7-I and R7-III CD8 T cell clones (Fig. 3D, right graph).

387

### 388 **R7-III has a higher contraction rate and does not persist in the late phase of chronic** 389 **infection**

390 At 5 weeks p.i. compared to 3 weeks p.i., we observed a dramatic decrease in the R7-III CD8  
391 T cell population in all of tested lymphoid and non-lymphoid organs while the R7-I CD8 T cell  
392 population decreased more subtly, which could be explained by natural contraction of the  
393 population after an initial expansion phase (Fig. 4A and Fig. S1B).

394

395 The formation of memory CD8 T cells in persistent infections is still controversial (39). In  
396 BALB/c mice where persistent *Toxoplasma* infection is known to be controlled by CD8 T cells  
397 (13), the presence of memory CD8 T cells is expected. We analysed if R7 CD8 T cells  
398 differentiated into memory cells and if the ratio of differentiation into effector and memory  
399 precursors was the same between R7-I and R7-III CD8 T cells. Short lived effector cells  
400 (SLEC, CD127<sup>-</sup>KLRG1<sup>-</sup>) were present in similar percentages in R7-I and R7-III CD8 T cell  
401 populations in the brain and spleen at 3 and 4 weeks p.i. (Fig. 4B). Memory precursor effector  
402 cells (MPEC, CD127<sup>+</sup>KLRG1<sup>-</sup>) were not present at 3 weeks p.i., however we detected  
403 population of MPEC at 4 weeks p.i. in the spleen in similar percentages between R7-I and R7-  
404 III CD8 T cell (Fig. 4B, bottom panel).

405

406 In the chronic phase of *Toxoplasma* infection in C57BL/6 mice CD8 T cells in the brain are  
407 exhausted and express high levels of the exhaustion marker PD1 (40). Blockade of the PD1–  
408 PDL1 pathway has been shown to rescue the exhaustion phenotype of CD8 T cells and prevent  
409 mortality of chronically *Toxoplasma* infected animals (41). In contrast to C57BL/6 mice,  
410 BALB/c mice are resistant to chronic *Toxoplasma* infection (9) and *Toxoplasma* GRA6-  
411 specific CD8 T cells in BALB/c mice lack PD1 expression during the chronic phase (14). We  
412 investigated if R7 CD8 T cells in brain of BALB/c mice at 3 weeks p.i. were exhausted. Almost  
413 90% of R7 CD8 T cells expressed PD1 (Fig. 4C). No significant difference was observed  
414 between R7-I and R7-III CD8 T cell populations in the brain suggesting that it is not exhaustion  
415 that leads to greater contraction of the R7-III CD8 T cell population. As PD1 can be also a  
416 marker for recently activated cells we analysed the ability of PD1<sup>+</sup> cells to produce IFN $\gamma$ , since  
417 cytokine production is lost in a truly exhausted cell (42). Brain mononuclear cells from week  
418 3 of infection were *ex vivo* re-stimulated with PMA and ionomycin and stained for IFN $\gamma$  (Fig.  
419 4D). More than half of PD1 positive cells were able to produce IFN $\gamma$  and only 1/3 of R7 CD8  
420 T cells in the brain were positive for PD1 and negative for IFN $\gamma$ . At the same time, only 5% of  
421 R7 cells in spleen expressed PD1 and did not produce IFN $\gamma$ . No significant difference between  
422 R7-I and R7-III CD8 T cells was observed indicating that the reason for the disappearance of  
423 R7-III CD8 T cells is independent of their exhaustion state.

424

425 Next, we considered CXCR3 as a candidate molecule to unravel the differences in persistence  
426 between R7-I and R7-III. The CXCR3 receptor is important in trafficking of CD8 T cells to  
427 nonlymphoid tissues including the brain (43). We evaluated CXCR3 expression levels on R7-  
428 I and R7-III CD8 T cells during *Toxoplasma* infection. CXCR3 expression on R7-III CD8 T  
429 cells was significantly lower at day 10 p.i. both in the brain and in the spleen (Fig. 4E). This  
430 suggests that R7-III cells may have a lower ability to travel to the brain than R7-I thus  
431 amounting a difference in their presence later in infection. To better understand the observed  
432 decrease in the brain population of R7-III CD8 T cells we set up bone marrow (BM) chimeras.  
433 We used the transplant conditioning drug busulfan to induce myeloablation and create a niche  
434 for the R7-I or R7-III bone marrow (44).

435  
436 In the brain and spleen, R7-I and R7-III BM chimeras have similar percentages of CD8 T cells  
437 originating from the donor's BM at both week 3 and 5 p.i. (Fig. 4E). These results show that  
438 constant replenishment from the periphery is necessary for the persistence of donor cells in the  
439 brain at 5 weeks p.i. When R7-III CD8 T cells disappear from the periphery, they also disappear  
440 from the brain. By creating chimeras, we showed that when we keep a constant R7-III  
441 population in the periphery these cells also persist in the brain.

442  
443 **R7-I CD8 T cells of T<sub>RM</sub> (CD103<sup>+</sup>) phenotype are present in higher percentages in the**  
444 **brain than R7-III CD8 T cells**

445 Previous studies have shown that tissue resident memory T cells found in the brain can survive  
446 without replenishment from the CD8 T cells circulating in the blood (15). Resident memory T  
447 cells were observed in higher percentage in R7-I than R7-III CD8 T cell populations 3 weeks  
448 p.i. in the brain (Fig. 5A). Bone marrow chimeras 3 weeks p.i. also exhibited lower percentages  
449 of R7-III T<sub>RM</sub> cells in the brain (Fig. 5B) indicating that the difference to produce less T<sub>RM</sub> is  
450 intrinsic to the R7-III clone independent of replenishment from periphery.

## 451 Discussion

452

453 Affinity of TCR-MHC interaction influences the fate of the activated T cell (2). Immediate  
454 effects of strong or weak interactions on activation and expansion of the T cells have been  
455 studied broadly (2,45,46). However, it is unclear how affinity influences memory CD8 T cell  
456 formation. Herein we studied three different clones of CD8 T cells (R7-I, II and III) during  
457 *Toxoplasma* infection in BALB/c mice. These three CD8 T cell clones harbour TCRs specific  
458 for the same peptide of the *Toxoplasma* protein ROP7, but differ in their sequence and affinity  
459 for that peptide presented in MHC class I (24,25). The hierarchy of affinity and functional *in*  
460 *vitro* responsiveness to ROP7-MHCI of the clones was R7-I>R7-III>R7-II (25). The lowest  
461 affinity clone R7-II failed to traffic to the brain during the chronic phase of infection even  
462 though we could show acute phase proliferation. R7-I outperformed R7-III in persistence in  
463 lymphoid organs and the brain in chronic infection. Additionally, R7-I was able to form more  
464 resident memory T cells in the brain than R7-III.

465

466 In order to test the affinity of the three R7 CD8 T cell clones in a more physiological setting,  
467 in addition to our previously published 3D affinity measurements, we performed 2D affinity  
468 measurements. Interestingly, we demonstrated little affinity difference between R7-I and R7-  
469 III. However, R7-I had a higher adhesion frequency than R7-III, possibly explaining the  
470 functional differences we observed between these clones in the chronic phase of infection.

471

472 R7-II, the clone with the lowest affinity for ROP7 peptide, was not found in the chronic state  
473 of *Toxoplasma* infection. Small number of the cells of that clone got activated and proliferated  
474 in the acute phase of infection, but after the contraction phase that clone could not be found  
475 neither in any analysed lymphoid organs nor in the brain. As one possible hypothesis, we  
476 demonstrated by RNAseq and subsequent qPCR that R7-II did not cross the affinity threshold  
477 required to downregulate *Klf2* levels and consequently set the cells for homing to infected  
478 tissues. Lack of homing and retention in the LN as a mechanism responsible for lack of R7-II  
479 in brain was also supported by increased CTLA-4 expression. CTLA-4 expression on T cells  
480 is known to be responsible for cells being stuck in the LN after antigen encounter and mark  
481 anergic cells (47,48). It is considered as one of T cell-intrinsic function of CTLA-4 to control  
482 self-reactive T cell motility in tissues (49). Signals from weak TCR-MHC interaction may  
483 prevent full activation of the T cell, but still enable it to receive partial signals (2). Little is  
484 known about transcriptional regulation of *Ctla-4* (50). It has not been investigated if *Klf2* can  
485 directly or indirectly regulate *Ctla-4* expression.

486

487 R7-I and R7-III clones were of higher affinity than the R7-II clone and both were found in the  
488 brain during the chronic phase of infection. The initially quite similar clones performed  
489 differently in the later phase of infection. While both clones were able to form SLEC and  
490 MPEP memory cells, the R7-III clone did not persist in the periphery and brain in the later  
491 phase of chronic infection. Additionally, in the brain, more R7-I than R7-III cells showed a  
492 phenotype of resident memory cells (CD69<sup>+</sup>CD103<sup>+</sup>). We postulate that these differences can  
493 be attributed to the increased adhesion frequency we observed in 2D measurements, as well as  
494 the increased TCR-MHC binding affinity exhibited in 3D measurements (25). We were not  
495 able to exactly pinpoint the reason for the disappearance of R7-III cells during the chronic  
496 phase of infection. It could be attributed to slower replication, higher rate of death, or formation  
497 of different types of cells that have different abilities to survive.

498

499 R7-III has been shown to be more proliferative than R7-I (more cell cycle terms in GO analysis)  
500 (25). Also, we observed slightly higher percentages of R7-III than R7-I cells in the spleen at 3

501 weeks p.i. indicating that the initial slower replication rate of R7-III is not the reason for  
502 differences between R7-I and R7-III observed in the later chronic phase of infection. SLEC  
503 and MPEC percentages were not significantly different between two clones. Additionally, the  
504 expression of the exhaustion marker PD-1 and the ability to produce IFN $\gamma$  also did not differ  
505 between R7-III and R7-I at 3 weeks p.i.

506

507 Creating bone marrow chimeras, we provided an artificial model where R7-specific CD8 T  
508 cells are routed from the bone marrow via the thymus to the periphery also during infection.  
509 This phenomenon has been described in persistent viral infections where host cells, but not  
510 donor cells, can be resupplied through thymic output, and new, naive specific CD8 T cells are  
511 being generated and subsequently primed during persistent infection (51). Newly generated T  
512 cells preserve antiviral CD8 T cell populations during chronic infection (51). In the C67BL/6  
513 mice model of *Toxoplasma* infection T cells are recruited from the periphery to the brain in the  
514 chronic stage (52).

515

516 In our bone marrow chimeras model, even if cells get exhausted or/and stop dividing, new R7  
517 specific cells are available to traffic to the brain. We concluded that constant replenishment  
518 from the periphery is necessary to keep the population of R7-III in the brain in the later stages  
519 of chronic infection. If the cells are available in the periphery they will traffic to the brain.  
520 Thus, since the R7-I clone exhibits longer survival in the periphery and in the brain without  
521 replenishment, we can conclude that cells of stronger affinity perform better in chronic  
522 infections.

523

524 The proportion of the cells with T<sub>RM</sub> phenotype was different between R7-I and R7-III donor  
525 population in the brain. R7-III cells persistently exhibited a lower percentage of T<sub>RM</sub> cells, no  
526 matter if able to replenish from the periphery in bone marrow chimeras or not. Additionally,  
527 R7-III cells exhibiting the phenotype of resident memory T cells (CD69<sup>+</sup>CD103<sup>+</sup>) at 3 weeks  
528 p.i. were absent from the brain at 5 weeks p.i.. This suggests that these were possibly not true  
529 (classical) T<sub>RM</sub> cells that are long lasting and shown to persist for years after infection.  
530 However, ‘classical’ T<sub>RM</sub> were defined in acute infection models with rechallenge (20,53). It  
531 is thus conceivable that in chronic infection they may have a different characteristic. Constant  
532 antigen stimulation during persistent infection may have a negative influence on T<sub>RM</sub> that are  
533 considered to be antigen independent. Persistent antigen stimulation has been shown to lower  
534 CD103 expression on T<sub>RM</sub> but it did not block their formation (54). It is possible that these  
535 cells become exhausted when constantly stimulated and thus only newly formed CD103  
536 positive cells contribute to the cells observed in the brain (23). It is possible that the strength  
537 of the antigen stimulation influences this process and lower affinity leads to lower number of  
538 R7-III cells expressing CD103, eventually leading to the elimination of these cells. Indeed, it  
539 has been shown that T<sub>RM</sub> in the brain exhibit about 20-fold higher affinity as compared to  
540 splenic memory cells (32). As in our model R7-I and R7-III CD8 T cell are different only in  
541 their TCR receptor, we propose that observed differences are due to the affinity. One caveat is  
542 that this difference may not only be derived from the affinity of the interaction with the cognate  
543 ROP7 peptide, but different TCRs may already shape the fitness of the cells differently in the  
544 thymus (25,55). Indeed, we previously showed that R7-I and R7-III cell respond differently to  
545 CD3/CD28 stimulation with R7-III is being more proliferative. Thus, the self-reactivity of T  
546 cells may also play a role in the later stages of an infection in shaping the memory CD8 T cell  
547 phenotype.

548

549 Effector T cells in chronic infection are constantly exposed to antigen leading to exhaustion  
550 (56,57). In the *Toxoplasma* infection model of C57BL/6 mice, it has been shown that chronic

551 infection leads to exhaustion of CD8 T cells in the brain (41,58). However, C57BL/6 mice,  
552 unlike BALB/c mice are not resistant to *Toxoplasma* and die in the chronic phase of infection  
553 (41,58). BALB/c mice, which we used in our model, are resistant to *Toxoplasma* and the  
554 chronic stage of infection is asymptomatic in this mouse strain. This implies that CD8 T cells  
555 in the BALB/c model are not exhausted. Indeed, recently published data by Chu *et al.* show  
556 that CD8 T cells specific for the immunodominant GRA6 epitope are not exhausted (14). The  
557 ROP7 epitope is subdominant, but has been shown to be well-represented in the chronic phase  
558 of infection (59). We observed high levels of PD-1 expression on brain resident R7-specific  
559 CD8 T cells. However, the majority of these cells were able to produce IFN $\gamma$  and could not be  
560 perceived as exhausted. The expression of PD-1 in this case may indicate recent antigen  
561 encounter, which is not surprising in chronic infection. In contrast with what was shown for  
562 Gra6- specific cells (14), our results indicate that CD8 T cells specific for subdominant epitopes  
563 do go through a contraction phase during chronic infection. R7-I and R7-III contraction  
564 happens after a peak in T cell numbers on days 14-21.

565

566 We conclude that R7-III cells, due to their lower affinity for the ROP7 peptide form less T<sub>RM</sub>  
567 cells and do not persist in the later stages of chronic infection. Our data indicate that among  
568 cells specific for the subdominant antigen the cells of higher affinity are favoured and their  
569 persistence is secured by formation of long-lasting T<sub>RM</sub> cells in the non-lymphoid tissues.

## 570 **Acknowledgements**

571

572 We acknowledge the NIH Tetramer Core Facility (contract HHSN272201300006C) for  
573 provision of H2Ld monomers with IPANAGRFF and photo-cleavable peptides. We would like  
574 to thank Blake Gibson for technical assistance. We are indebted to the Mill Hill Biological  
575 Services and FACS facility. We would like to thank Ben Seddon, George Kassiotis, Jean  
576 Langhorne, Charles Sinclair, Thea Hogan and Jie Yang for discussion. This work was  
577 supported by the Francis Crick Institute, which receives its core funding from Cancer Research  
578 UK (FC001076), the UK Medical Research Council (FC001076), and the Wellcome Trust  
579 (FC001076). Eva-Maria Frickel was supported by a Wellcome Trust Career Development  
580 Fellowship (091664/B/10/Z).



581 **Author Contributions**

582

583 AS, NY, EMK conducted experiments, AS, NY, EMK, HP and BDE analysed the data, BDE  
584 provided essential technology, AS and EMF wrote the manuscript, EMF directed the study.

585 **Conflict of Interest**

586

587 The authors declare no conflict of interests.

588

## 589 References

- 590
- 591 1. Joshi NS, Cui W, Chandele A, Lee HK, Urso DR, Hageman J, Gapin L, Kaech SM.  
592 Inflammation Directs Memory Precursor and Short-Lived Effector CD8<sup>+</sup> T Cell Fates  
593 via the Graded Expression of T-bet Transcription Factor. *Immunity* (2007) **27**:281–295.  
594 doi:10.1016/j.immuni.2007.07.010
  - 595 2. Zehn D, Lee SY, Bevan MJ. Complete but curtailed T-cell response to very low-affinity  
596 antigen. *Nature* (2009) **458**:211–214. doi:10.1038/nature07657
  - 597 3. Virgin HW, Wherry EJ, Ahmed R. Redefining Chronic Viral Infection. *Cell* (2009)  
598 **138**:30–50. doi:10.1016/j.cell.2009.06.036
  - 599 4. Wherry EJ. T cell exhaustion. *Nat Immunol* (2011) **12**:492–499. doi:10.1038/ni.2035
  - 600 5. Merckenschlager J, Kassiotis G. Narrowing the gap: Preserving repertoire diversity  
601 despite clonal selection during the CD4 T cell response. *Front Immunol* (2015) **6**:1–11.  
602 doi:10.3389/fimmu.2015.00413
  - 603 6. Mandl JN, Monteiro JP, Vriskoop N, Germain RN. T Cell-Positive Selection Uses Self-  
604 Ligand Binding Strength to Optimize Repertoire Recognition of Foreign Antigens.  
605 *Immunity* (2013) **38**:263–274. doi:10.1016/j.immuni.2012.09.011
  - 606 7. Parker SJ, Roberts CW, Alexander J. CD8<sup>+</sup> T cells are the major lymphocyte  
607 subpopulation involved in the protective immune response to *Toxoplasma gondii* in  
608 mice. *Clin Exp Immunol* (1991) **84**:207–212.
  - 609 8. Suzuki Y, Conley FK, Remington JS. Importance of endogenous IFN-gamma for  
610 prevention of toxoplasmic encephalitis in mice. *J Immunol* (1989) **143**:2045–50.  
611 doi:0022-1767/89/1436-2045\$02.00/0
  - 612 9. Brown, C.R., McLeod R. Class I MHC genes and CD8 + T cells determine cyst number  
613 in *Toxoplasma gondii*. *J Immunol* (1990) **145**:3438–3441.
  - 614 10. Brown CR, Hunter CA, Estes RG, Beckmann E, Forman J, David C, Remington JS,  
615 McLeod R. Definitive identification of a gene that confers resistance against  
616 *Toxoplasma* cyst burden and encephalitis. *Immunology* (1995) **85**:419–428.
  - 617 11. Blanchard N, Gonzalez F, Schaeffer M, Joncker NT, Cheng T, Shastri AJ, Robey EA,  
618 Shastri N. Immunodominant, protective response to the parasite *Toxoplasma gondii*  
619 requires antigen processing in the endoplasmic reticulum. *Nat Immunol* (2008) **9**:937–  
620 944. doi:10.1038/ni.1629
  - 621 12. Suzuki Y, Joh K, Orellana MA, Conley FK, Remington JS. A gene(s) within the H-2D  
622 region determines the development of toxoplasmic encephalitis in mice. *Immunology*  
623 (1991) **74**:732–9.
  - 624 13. Suzuki Y, Sa Q, Gehman M, Ochiai E. Interferon-gamma- and perforin-mediated  
625 immune responses for resistance against *Toxoplasma gondii* in the brain. *Expert Rev*  
626 *Mol Med* (2011) **13**:e31. doi:10.1017/S1462399411002018
  - 627 14. Chu HH, Chan SW, Gosling JP, Blanchard N, Tsitsiklis A, Lythe G, Shastri N, Molina-  
628 Paris C, Robey EA. Continuous Effector CD8<sup>+</sup>T Cell Production in a Controlled  
629 Persistent Infection Is Sustained by a Proliferative Intermediate Population. *Immunity*  
630 (2016) **45**:159–171. doi:10.1016/j.immuni.2016.06.013
  - 631 15. Wakim LM, Woodward-Davis A, Liu R, Hu Y, Villadangos J, Smyth G, Bevan MJ. The  
632 Molecular Signature of Tissue Resident Memory CD8 T Cells Isolated from the Brain.  
633 *J Immunol* (2012) **189**:3462–3471. doi:10.4049/jimmunol.1201305
  - 634 16. Schenkel JM, Fraser KA, Masopust D. Cutting Edge: Resident Memory CD8 T Cells  
635 Occupy Frontline Niches in Secondary Lymphoid Organs. *J Immunol* (2014) **192**:2961–  
636 2964. doi:10.4049/jimmunol.1400003
  - 637 17. Gebhardt T, Mackay LK. Local immunity by tissue-resident CD8<sup>+</sup> memory T cells.  
638 *Front Immunol* (2012) **3**:1–12. doi:10.3389/fimmu.2012.00340

- 639 18. Mackay LK, Stock AT, Ma JZ, Jones CM, Kent SJ, Mueller SN, Heath WR, Carbone  
640 FR, Gebhardt T. Long-lived epithelial immunity by tissue-resident memory T (TRM)  
641 cells in the absence of persisting local antigen presentation. *Proc Natl Acad Sci* (2012)  
642 **109**:7037–7042. doi:10.1073/pnas.1202288109
- 643 19. Sheridan BS, Pham QM, Lee YT, Cauley LS, Puddington L, Lefrançois L. Oral infection  
644 drives a distinct population of intestinal resident memory cd8+t cells with enhanced  
645 protective function. *Immunity* (2014) **40**:747–757. doi:10.1016/j.immuni.2014.03.007
- 646 20. Wakim LM, Woodward-Davis A, Bevan MJ. Memory T cells persisting within the brain  
647 after local infection show functional adaptations to their tissue of residence. *Proc Natl*  
648 *Acad Sci* (2010) **107**:17872–17879. doi:10.1073/pnas.1010201107
- 649 21. Ariotti S, Beltman JB, Chodaczek G, Hoekstra ME, van Beek AE, Gomez-Eerland R,  
650 Ritsma L, van Rheenen J, Maree AFM, Zal T, et al. Tissue-resident memory CD8+ T  
651 cells continuously patrol skin epithelia to quickly recognize local antigen. *Proc Natl*  
652 *Acad Sci* (2012) **109**:19739–19744. doi:10.1073/pnas.1208927109
- 653 22. Steinert EM, Schenkel JM, Fraser KA, Beura LK, Manlove LS, Igyártó BZ, Southern  
654 PJ, Masopust D. Quantifying memory CD8 T cells reveals regionalization of  
655 immunosurveillance. *Cell* (2015) **161**:737–749. doi:10.1016/j.cell.2015.03.031
- 656 23. Landrith TA, Sureshchandra S, Rivera A, Jang JC, Rais M, Nair MG, Messaoudi I,  
657 Wilson EH, Gigley JP, Pino-lagos K, et al. CD103+ CD8 T Cells in the Toxoplasma-  
658 Infected Brain Exhibit a Tissue-Resident Memory Transcriptional Profile. (2017) **8**:7–  
659 9. doi:10.3389/fimmu.2017.00335
- 660 24. Kirak O, Frickel EM, Grotenbreg GM, Suh H, Jaenisch R, Ploegh HL. Transnuclear  
661 mice with predefined T cell receptor specificities against toxoplasma gondii obtained  
662 via SCNT. *Science (80- )* (2010) **328**:243–248. doi:10.1126/science.1178590
- 663 25. Swee LK, Tan ZW, Sanecka A, Yoshida N, Patel H, Grotenbreg G, Frickel E-M, Ploegh  
664 HL. Peripheral self-reactivity regulates antigen-specific CD8 T-cell responses and cell  
665 division under physiological conditions. *Open Biol* (2016) **6**:160293.  
666 doi:10.1098/rsob.160293
- 667 26. Pino PA, Cardona AE. Isolation of Brain and Spinal Cord Mononuclear Cells Using  
668 Percoll Gradients. (2011)e2348. doi:doi:10.3791/2348
- 669 27. Martinez RJ, Andargachew R, Martinez HA, Evavold BD. Low-affinity CD4+ T cells  
670 are major responders in the primary immune response. *Nat Commun* (2016) **7**:1–10.  
671 doi:10.1038/ncomms13848
- 672 28. Merckenschlager J, Ploquin MJ, Eksmond U, Andargachew R, Thorborn G, Filby A,  
673 Pepper M, Evavold B, Kassiotis G. Stepwise B-cell-dependent expansion of T helper  
674 clonotypes diversifies the T-cell response. *Nat Commun* (2016) **7**:  
675 doi:10.1038/ncomms10281
- 676 29. Li B, Dewey CN. RSEM: Accurate transcript quantification from RNA-Seq data with  
677 or without a reference genome. *BMC Bioinformatics* (2011) **12**: doi:10.1186/1471-2105-  
678 12-323
- 679 30. Karolchik D. The UCSC Table Browser data retrieval tool. *Nucleic Acids Res* (2004)  
680 **32**:493D–496. doi:10.1093/nar/gkh103
- 681 31. Love MI, Huber W, Anders S. Moderated estimation of fold change and dispersion for  
682 RNA-seq data with DESeq2. *Genome Biol* (2014) **15**:1–21. doi:10.1186/s13059-014-  
683 0550-8
- 684 32. Frost EL, Kersh AE, Evavold BD, Lukacher AE. Cutting Edge: Resident Memory CD8  
685 T Cells Express High-Affinity TCRs. *J Immunol* (2015) **195**:3520–3524.  
686 doi:10.4049/jimmunol.1501521
- 687 33. Hood JD, Zarnitsyna VI, Zhu C, Evavold BD. Regulatory and T Effector Cells Have  
688 Overlapping Low to High Ranges in TCR Affinities for Self during Demyelinating

- 689 Disease. *J Immunol* (2015) **195**:4162–4170. doi:10.4049/jimmunol.1501464
- 690 34. Weinreich MA, Takada K, Skon C, Reiner SL, Jameson SC, Hogquist KA. KLF2  
691 Transcription-Factor Deficiency in T Cells Results in Unrestrained Cytokine Production  
692 and Upregulation of Bystander Chemokine Receptors. *Immunity* (2009) **31**:122–130.  
693 doi:10.1016/j.immuni.2009.05.011
- 694 35. Carlson CM, Endrizzi BT, Wu J, Ding X, Weinreich MA, Walsh ER, Wani MA, Lingrel  
695 JB, Hogquist KA, Jameson SC. Kruppel-like factor 2 regulates thymocyte and T-cell  
696 migration. *Nature* (2006) **442**:299–302. doi:10.1038/nature04882
- 697 36. Bai A, Hu H, Yeung M, Chen J. Kruppel-Like Factor 2 Controls T Cell Trafficking by  
698 Activating L-Selectin (CD62L) and Sphingosine-1-Phosphate Receptor 1 Transcription.  
699 *J Immunol* (2007) **178**:7632–7639. doi:10.4049/jimmunol.178.12.7632
- 700 37. Schober SL, Kuo CT, Schluns KS, Lefrancois L, Leiden JM, Jameson SC. Expression  
701 of the transcription factor lung Krüppel-like factor is regulated by cytokines and  
702 correlates with survival of memory T cells in vitro and in vivo. *J Immunol* (1999)  
703 **163**:3662–7. Available at: <http://www.ncbi.nlm.nih.gov/pubmed/10490960>
- 704 38. Preston GC, Feijoo-Carnero C, Schurch N, Cowling VH, Cantrell DA. The Impact of  
705 KLF2 Modulation on the Transcriptional Program and Function of CD8 T Cells. *PLoS*  
706 *One* (2013) **8**:1–16. doi:10.1371/journal.pone.0077537
- 707 39. Zehn D, Utzschneider DT, Thimme R. Immune-surveillance through exhausted effector  
708 T-cells. *Curr Opin Virol* (2016) **16**:49–54. doi:10.1016/j.coviro.2016.01.002
- 709 40. Wilson EH, Harris TH, Mrass P, John B, Tait ED, Wu GF, Pepper M, Wherry EJ,  
710 Dzierzinski F, Roos D, et al. Behavior of Parasite-Specific Effector CD8+T Cells in the  
711 Brain and Visualization of a Kinesin-Associated System of Reticular Fibers. *Immunity*  
712 (2009) **30**:300–311. doi:10.1016/j.immuni.2008.12.013
- 713 41. Bhadra R, Gigley JP, Weiss LM, Khan IA. Control of Toxoplasma reactivation by  
714 rescue of dysfunctional CD8+ T-cell response via PD-1-PDL-1 blockade. *Proc Natl*  
715 *Acad Sci* (2011) **108**:9196–9201. doi:10.1073/pnas.1015298108
- 716 42. Wherry EJ, Kurachi M. Molecular and cellular insights into T cell exhaustion. *Nat Rev*  
717 *Immunol* (2015) **15**:486–499. doi:10.1038/nri3862
- 718 43. Zhang B, Chan YK, Lu B, Diamond MS, Klein RS. CXCR3 Mediates Region-Specific  
719 Antiviral T Cell Trafficking within the Central Nervous System during West Nile Virus  
720 Encephalitis. *J Immunol* (2008) **180**:2641–2649. doi:10.4049/jimmunol.180.4.2641
- 721 44. Hogan T, Gossel G, Yates AJ, Seddon B. Temporal fate mapping reveals age-linked  
722 heterogeneity in naive T lymphocytes in mice. *Proc Natl Acad Sci* (2015) **112**:E6917–  
723 E6926. doi:10.1073/pnas.1517246112
- 724 45. King CG, Koehli S, Hausmann B, Schmalzer M, Zehn D, Palmer E. T Cell Affinity  
725 Regulates Asymmetric Division, Effector Cell Differentiation, and Tissue Pathology.  
726 *Immunity* (2012) **37**:709–720. doi:10.1016/j.immuni.2012.06.021
- 727 46. Man K, Miasari M, Shi W, Xin A, Henstridge DC, Preston S, Pellegrini M, Belz GT,  
728 Smyth GK, Febbraio MA, et al. The transcription factor IRF4 is essential for TCR  
729 affinity-mediated metabolic programming and clonal expansion of T cells. *Nat Immunol*  
730 (2013) **14**:1155–1165. doi:10.1038/ni.2710
- 731 47. Krummel BMF, Allison J. CD28 and CTLA-4 have opposing effects on the response of  
732 T cells to stimulation. (1995) **182**:459–465.
- 733 48. Greenwald RJ, Boussiotis VA, Lorschach RB, Abbas AK, Sharpe AH. CTLA-4 regulates  
734 induction of anergy in vivo. *Immunity* (2001) **14**:145–155. doi:10.1016/S1074-  
735 7613(01)00097-8
- 736 49. Jain N, Miu B, Jiang J, McKinstry KK, Prince A, Swain SL, Greiner DL, Thomas CJ,  
737 Sanderson MJ, Berg LJ, et al. CD28 and ITK signals regulate autoreactive T cell  
738 trafficking. *Nat Med* (2013) **19**:1632–1637. doi:10.1038/nm.3393

- 739 50. Gibson HM, Hedgcock CJ, Aufiero BM, Wilson AJ, Hafner MS, Tsokos GC, Wong  
740 HK. Induction of the CTLA-4 Gene in Human Lymphocytes Is Dependent on NFAT  
741 Binding the Proximal Promoter. *J Immunol* (2007) **179**:3831–3840.  
742 doi:10.4049/jimmunol.179.6.3831
- 743 51. Vezys V, Masopust D, Kemball CC, Barber DL, O’Mara LA, Larsen CP, Pearson TC,  
744 Ahmed R, Lukacher AE. Continuous recruitment of naive T cells contributes to  
745 heterogeneity of antiviral CD8 T cells during persistent infection. *J Exp Med* (2006)  
746 **203**:2263–2269. doi:10.1084/jem.20060995
- 747 52. Wilson EH, Harris TH, Mrass P, John B, Tait ED, Wu GF, Pepper M, Wherry EJ,  
748 Dzierzinski F, Roos D, et al. Behavior of Parasite-Specific Effector CD8 + T Cells in the  
749 Brain and Visualization of a Kinesin-Associated System of Reticular Fibers. *Immunity*  
750 (2009) **30**:1–12. doi:10.1016/j.immuni.2008.12.013
- 751 53. Gebhardt T, Wakim LM, Eidsmo L, Reading PC, Heath WR, Carbone FR. Memory T  
752 cells in nonlymphoid tissue that provide enhanced local immunity during infection with  
753 herpes simplex virus. *Nat Immunol* (2009) **10**:524–530. doi:10.1038/ni.1718
- 754 54. Casey KA, Fraser KA, Schenkel JM, Moran A, Abt MC, Beura LK, Lucas PJ, Artis D,  
755 Wherry EJ, Hogquist K, et al. Antigen-Independent Differentiation and Maintenance of  
756 Effector-like Resident Memory T Cells in Tissues. *J Immunol* (2012) **188**:4866–4875.  
757 doi:10.4049/jimmunol.1200402
- 758 55. Fulton RB, Hamilton SE, Xing Y, Best JA, Goldrath AW, Hogquist KA, Jameson SC.  
759 The TCR’s sensitivity to self peptide-MHC dictates the ability of naive CD8 + T cells  
760 to respond to foreign antigens. *Nat Immunol* (2015) **16**:107–117. doi:10.1038/ni.3043
- 761 56. Zajac AJ, Blattman JN, Murali-Krishna K, Sourdive DJD, Suresh M, Altman JD, Ahmed  
762 R. Viral Immune Evasion Due to Persistence of Activated T Cells Without Effector  
763 Function. *J Exp Med* (1998) **188**:2205–2213. doi:10.1084/jem.188.12.2205
- 764 57. Wherry EJ, Blattman JN, Murali-krishna K, Most R Van Der, Ahmed R. Viral  
765 Persistence Alters CD8 T-Cell Immunodominance and Tissue Distribution and Results  
766 in Distinct Stages of Functional Impairment Viral Persistence Alters CD8 T-Cell  
767 Immunodominance and Tissue Distribution and Results in Distinct Stages of Functional  
768 Im. *J Virol* (2003) **77**:4911–3927. doi:10.1128/JVI.77.8.4911
- 769 58. Bhadra R, Khan IA. IL-7 and IL-15 do not synergize during CD8 T cell recall response  
770 against an obligate intracellular parasite. *Microbes Infect* (2012) **14**:1160–1168.  
771 doi:10.1016/j.micinf.2012.07.018
- 772 59. Frickel E, Sahoo N, Hopp J, Gubbels M, Craver MPJ, Knoll LJ, Ploegh HL, Grotenbreg  
773 GM. Parasite Stage-Specific Recognition of Endogenous *Toxoplasma gondii* -Derived  
774 CD8 + T Cell Epitopes. *J Infect Dis* (2008) **198**:1625–1633. doi:10.1086/593019  
775  
776

## 777 **Figure Legends**

778

### 779 **Figure 1. Three distinct CD8 T cell clones of the same specificity exhibit different 2D** 780 **affinity and responses to specific TCR receptor stimulation.**

781 A) Ca<sup>2+</sup> flux profile of the three R7 CD8 T cell lines upon stimulation of TCR signalling with  
782 ROP7 dextramer (representative of two experiments with multiple mice each). B)  
783 Phosphorylation of ERK1/2 kinase in time upon stimulation with splenocytes loaded with  
784 ROP7 peptide (representative of two experiments). C) Proliferation of R7 CD8 T cells after  
785 stimulation with a range of ROP7 peptide concentrations (representative of three experiments).  
786 D) Relative 2D affinity of the three R7 CD8 T cell clones specific for ROP7 (IPAAAGRFF)  
787 normalized by TCR surface density. Each individual data point represents the affinity for a  
788 single CD8 T cell. Analysis utilizes the geometric mean of the population. E) Adhesion  
789 frequencies of the three ROP7 clones F) Gaussian curves were fitted to the affinities of (D)  
790 Blue line represents R7-I, red line represents R7-II and the green line represents R7-III. Data  
791 are cumulative from two individual experiments and a total of 3 mice per clone.

792

### 793 **Figure 2. Three clones of R7-reactive CD8 T cells are primed and activated during the** 794 **acute phase of *Toxoplasma* infection.**

795 A) Schematic diagram of the experimental set-up for *in vivo* experiments. Transnuclear R7  
796 mice were used as a donor of CD8 T cells in adoptive transfer experiments (AT). CD8 T cells  
797 isolated from lymph nodes and spleens were transferred to congenic recipients. Recipient mice  
798 were infected orally with 5 cysts of *Toxoplasma* ME49. At different time points post-infection  
799 (p.i.) recipient mice were sacrificed and donor CD8 T cell populations were assessed. B) Donor  
800 cells were stained with CFSE before transfer. Histograms show CFSE dilution and CD69  
801 expression on transferred R7 CD8 T cells isolated from mesenteric (mLN) 6 days p.i.  
802 (representative of two independent experiments).

803

### 804 **Figure 3. R7-II CD8 T cells do not persist and do not reach the brain of recipient mice** 805 **during *Toxoplasma* infection.**

806 A) Percentages and total cell numbers of donor ROP7 CD8 T cells in the brain and lymphoid  
807 organs 3 weeks p.i. (representative of at least 5 experiments with 3 mice per line), \*  $p \leq 0.05$ ,  
808 \*\*  $p \leq 0.01$ , \*\*\*  $p \leq 0.001$ , 2-way Anova followed by multiple comparisons Tuckey's. Mean  
809 and SD. B) Percentages and cell numbers of donor R7 CD8 T cells in the brain and spleen in  
810 the acute phase of infection (day 10 p.i.) (representative of two experiments), \*  $p \leq 0.05$ , \*\*  $p$   
811  $\leq 0.01$ , \*\*\*  $p \leq 0.001$  one-way Anova followed by multiple comparisons Tuckey's. Mean and  
812 SD. C) Splenocytes of R7 mice were left untreated (unstimulated) or stimulated with the Rop7  
813 peptide (activated) over night. On the next day ROP7tet<sup>+</sup> CD8 T cells were sorted and lysed for  
814 RNA extraction. Transcripts levels were evaluated in an RNAseq experiment. Expression of  
815 *Klf2* and *Klf2*-regulated genes is shown as a number of transcripts per million (TMP) in  
816 unstimulated and activated (left hand graph) or only activated R7 CD8 T cells (right graph).  
817 D) Validation of RNAseq results was performed on samples from an independent experiment  
818 with use of qRT-PCR. Expression of *Klf2* and *Klf2*-regulated genes shown as normalized 2<sup>-</sup>  
819  $\Delta\Delta Ct$  values. E) *CTLA4* expression in the RNAseq experiment shown as number of TMPs in  
820 activated samples (left graph) and CTLA4 protein expression evaluated by FACS of cells  
821 isolated 5 days p.i. from LN of mice adoptively transferred with R7 cells and infected with  
822 *Toxoplasma* (right graph). \*  $p \leq 0.05$ , \*\*  $p \leq 0.01$ , \*\*\*  $p \leq 0.001$ .

823

### 824 **Figure 4. R7-III has a higher contraction rate and does not persist into the late phase of** 825 **the chronic infection.**

826 ROP7 CD8 T cells were adoptively transferred into congenic mice before *Toxoplasma*  
827 infection. Spleen, mesenteric LN and popliteal and axillary LN and brains were harvested and  
828 analysed by flow cytometry (A-E). A) Percentages and total cell numbers of donor Rop7 CD8  
829 T cells in the brain and spleen 3 and 5 weeks p.i. (representative of at least 5 experiments). \*  $p$   
830  $\leq 0.05$ , \*\*  $p \leq 0.01$ , \*\*\*  $p \leq 0.001$ , Two-way Anova followed by Tuckey multiple comparisons  
831 test. B) Donor population was assessed for expression of CD127 (IL7Ra) and KLRG1 at 3 and  
832 4 weeks p.i.. (representative of at least 5 experiments) C) PD1 expression on donor CD8 T cells  
833 in the brain 3 weeks p.i. and their potential to produce IFN $\gamma$  after *ex-vivo* restimulation with  
834 PMA/Ionomycin, (representative of 2 experiments). \*  $p \leq 0.05$ , \*\*  $p \leq 0.01$ , \*\*\*  $p \leq 0.001$  by  
835 Student t-test. D) CXCR3 surface staining on donor CD8 T cells 10 days p.i. in brain and  
836 spleen. E) Percentages of R7 CD8 T cells in brain and spleen of R7 bone marrow chimeras at  
837 3 and 5 weeks (minimum of 3 mice analysed per condition) p.i.. \*  $p \leq 0.05$ , \*\*  $p \leq 0.01$ , \*\*\*  $p$   
838  $\leq 0.001$  by Student t-test.

839

840 **Figure 5. R7-I CD8 T cells of Trm (CD103<sup>+</sup>) phenotype are present in higher percentages**  
841 **in the brain than R7-III CD8 T cells.**

842 A) Representative FACS plot of donor resident memory population and percentages of donor  
843 and host CD8 Trm cells in the brain 3 weeks p.i. (representative of at least 5 experiments). \*  $p$   
844  $\leq 0.05$ , \*\*  $p \leq 0.01$ , \*\*\*  $p \leq 0.001$  2-way Anova followed by Sidak's multiple comparisons  
845 test. B) Trm percentages in brains of R7 bone marrow chimeras mice 3 weeks p.i., 3 mice per  
846 T cell line, \*  $p \leq 0.05$ , \*\*  $p \leq 0.01$ , \*\*\*  $p \leq 0.001$  by Student t-test.



847 **Tables**

848

Up in R7-II (FC>2531 genes)

|    | Gene symbol    | FC    | FDR       |
|----|----------------|-------|-----------|
| 1  | Tnfrsf19/CD137 | 19.20 | 5.84E-105 |
| 2  | Mturn          | 14.93 | 1.95E-77  |
| 3  | Rasgrp2        | 13.49 | 1.27E-90  |
| 4  | Slc6a19        | 12.84 | 2.18E-44  |
| 5  | Cd7            | 11.38 | 4.03E-49  |
| 6  | S1pr1          | 9.77  | 1.21E-44  |
| 7  | Nsg2           | 9.68  | 3.28E-34  |
| 8  | Klf2           | 8.80  | 4.88E-149 |
| 9  | Atp6v0e2       | 8.60  | 1.18E-29  |
| 10 | Arl4c          | 8.45  | 5.70E-105 |

Down in R7-II (FC>2119 genes)

|    | Gene symbol   | FC    | FDR       |
|----|---------------|-------|-----------|
| 1  | Tbx21/Tbet    | -6.45 | 4.64E-38  |
| 2  | Tnfsf11/RANKL | -6.07 | 5.80E-160 |
| 3  | Serpinb6b     | -5.64 | 2.11E-42  |
| 4  | Dapl1         | -5.51 | 1.15E-38  |
| 5  | Ccl9          | -5.46 | 3.81E-93  |
| 6  | Rnf157        | -4.89 | 5.80E-78  |
| 7  | Tbkbp1        | -4.51 | 2.74E-32  |
| 8  | Lipg          | -4.51 | 4.47E-72  |
| 9  | Stc2          | -4.14 | 8.38E-16  |
| 10 | Chst11        | -3.95 | 1.98E-56  |

849

850 **Table 1. Top 10 up and downregulated genes in activated R7-II vs R7-I and R7-III**

851 Table shows top 10 up and downregulated genes in R7-II samples as compared with R7-I and  
 852 R7-III samples upon activation, where only genes differentially expressed in R7-II vs R7-I and  
 853 R7-II vs R7-III comparisons but similar expression between R7-I and R7-III were included.  
 854 For each gene in the table fold change (FC) and false discovery rate (FDR) is shown form R7-  
 855 II vs R7-III comparison.

Figure 1

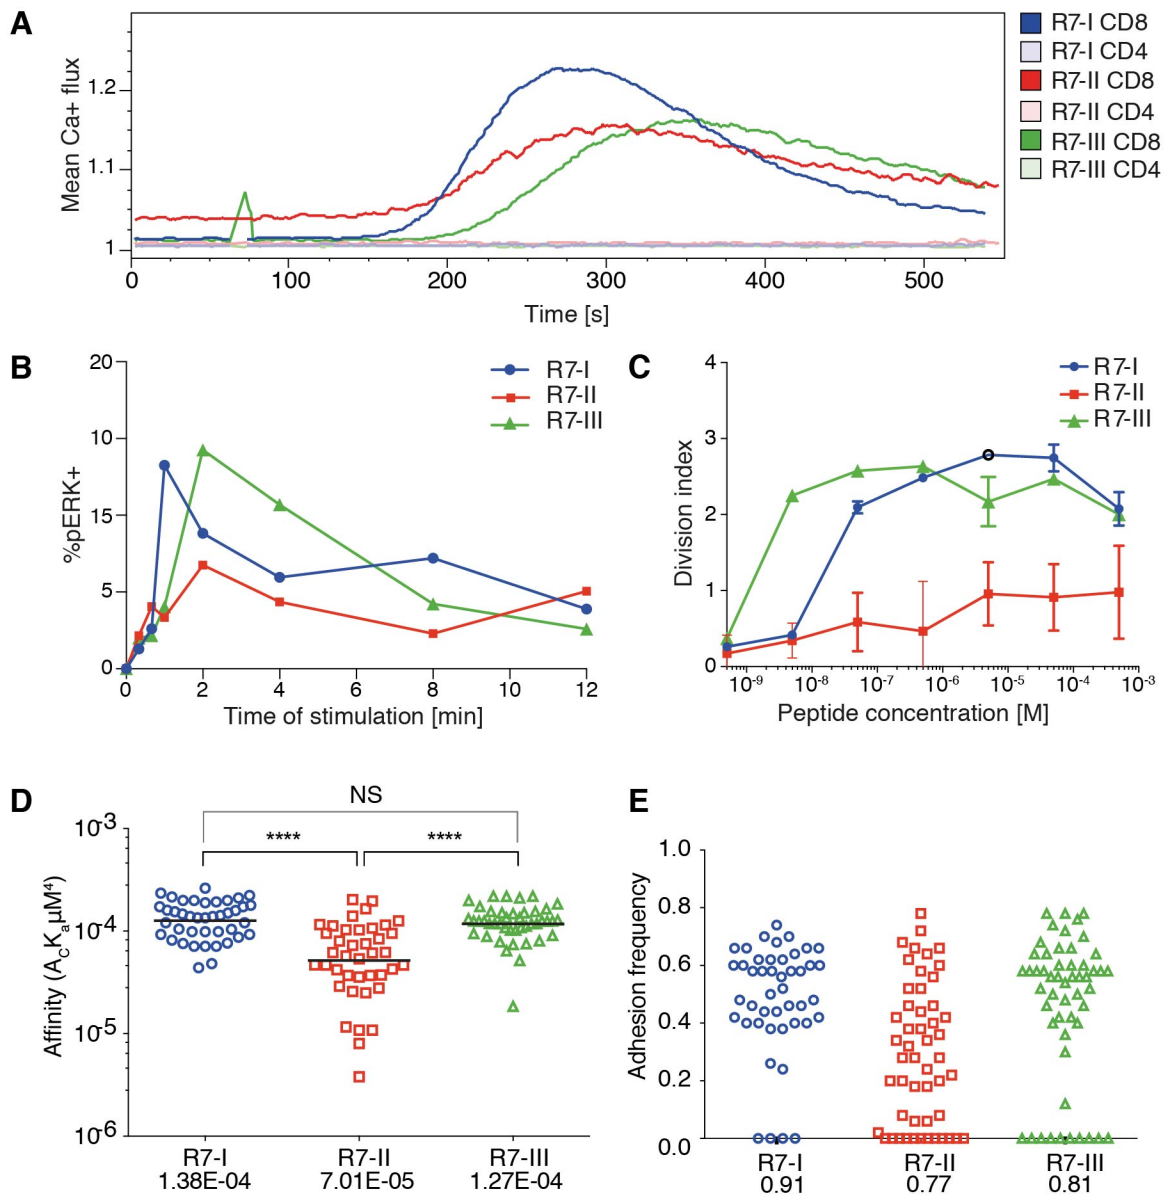

## Figure 2

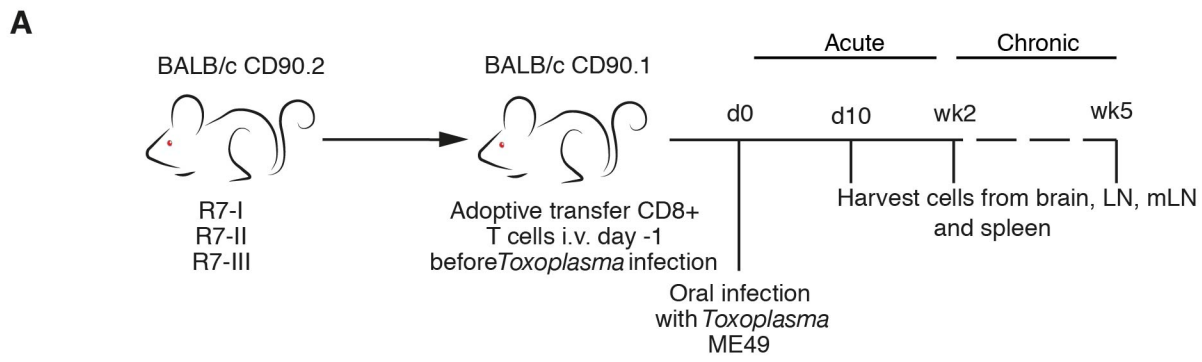

**B**

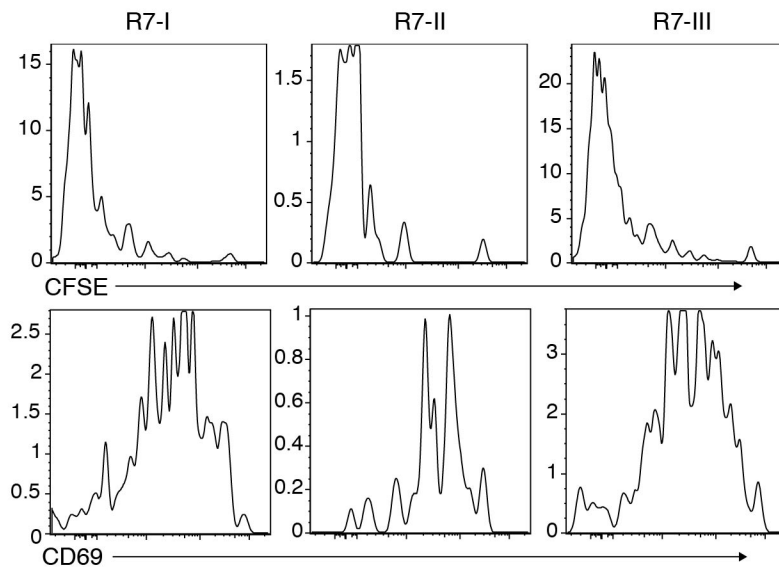

Figure 3

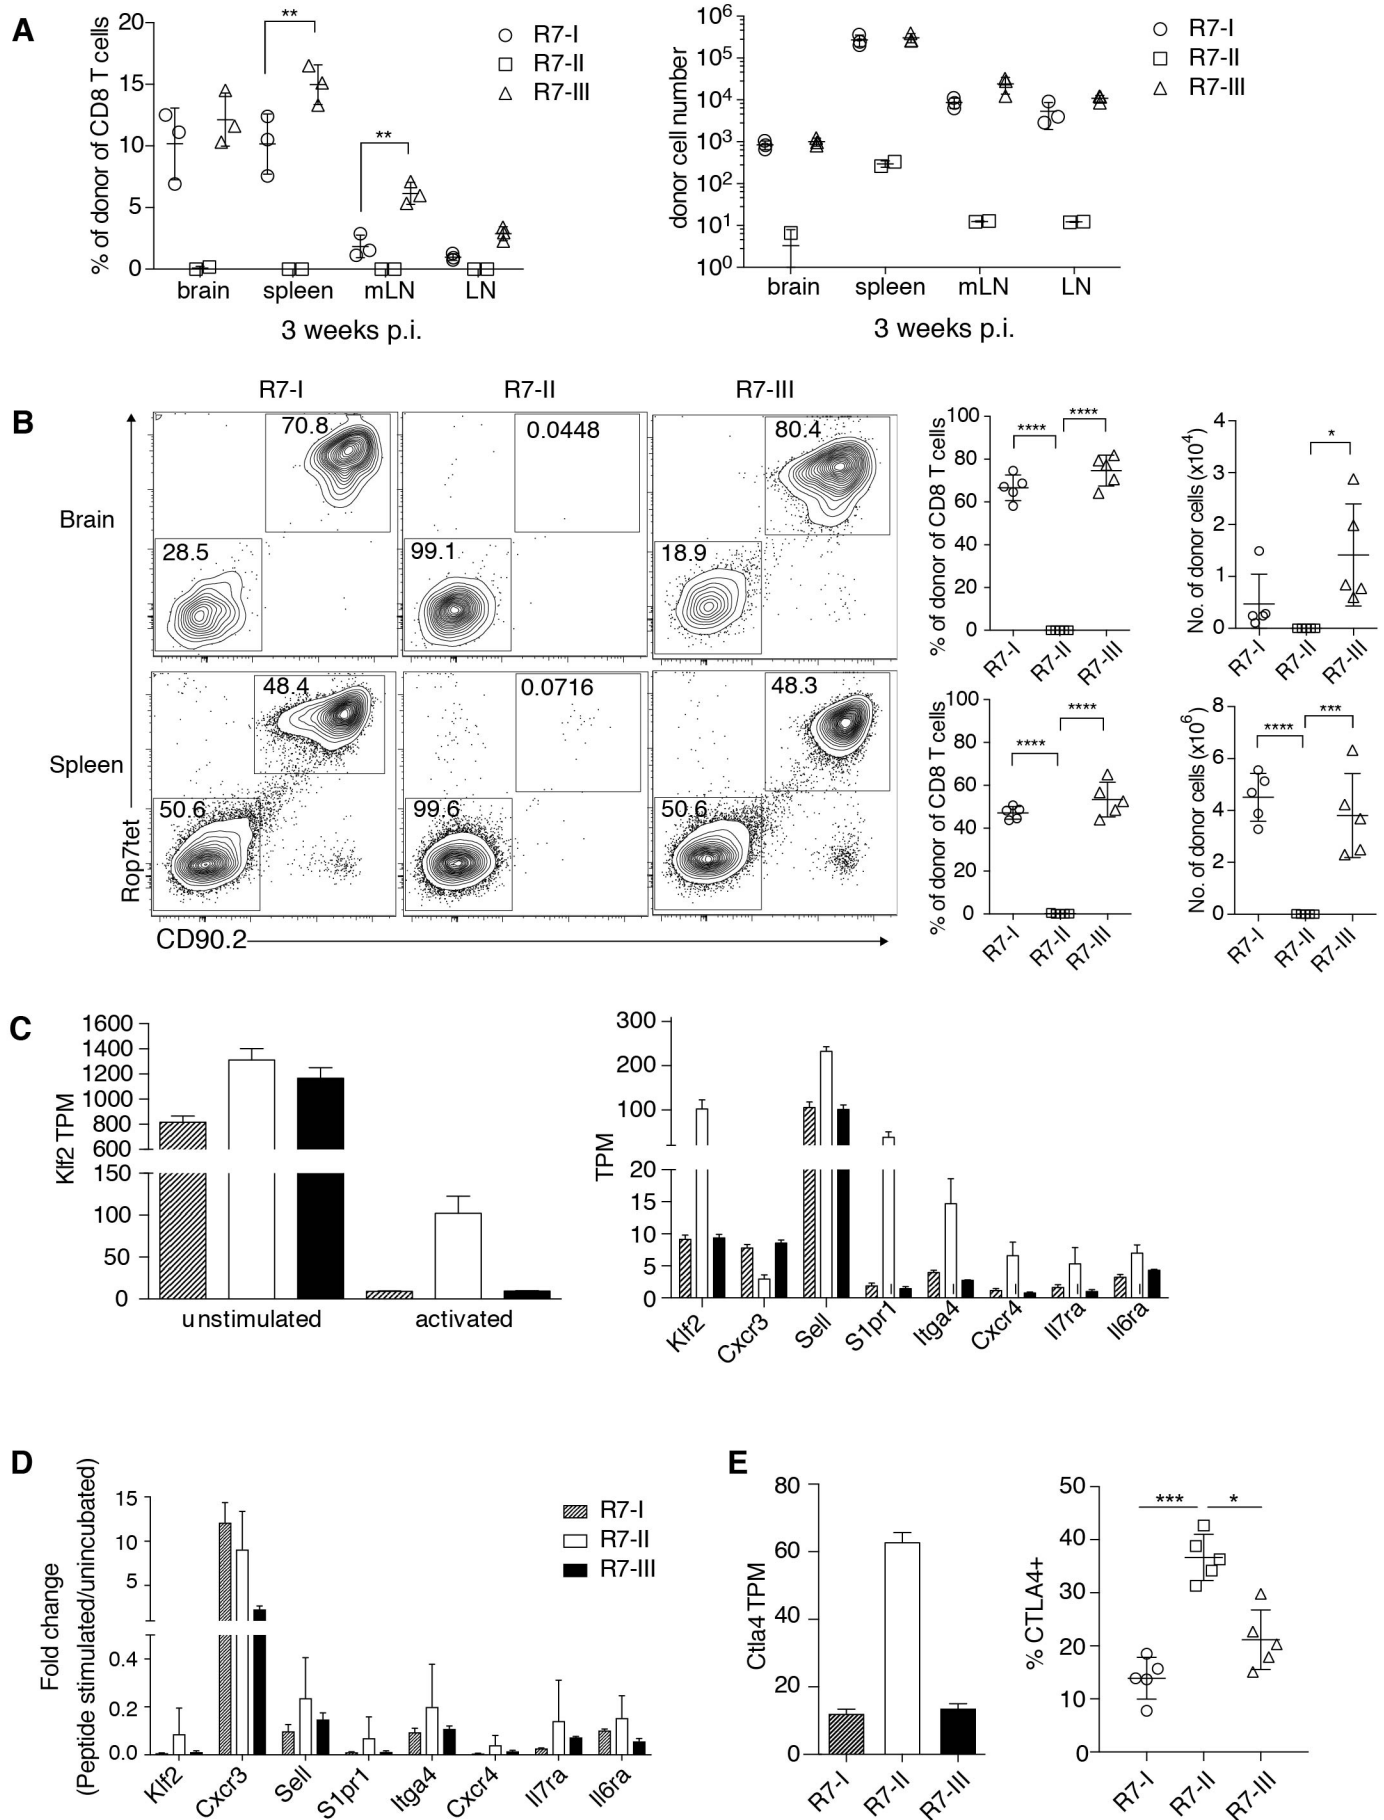

Figure 4

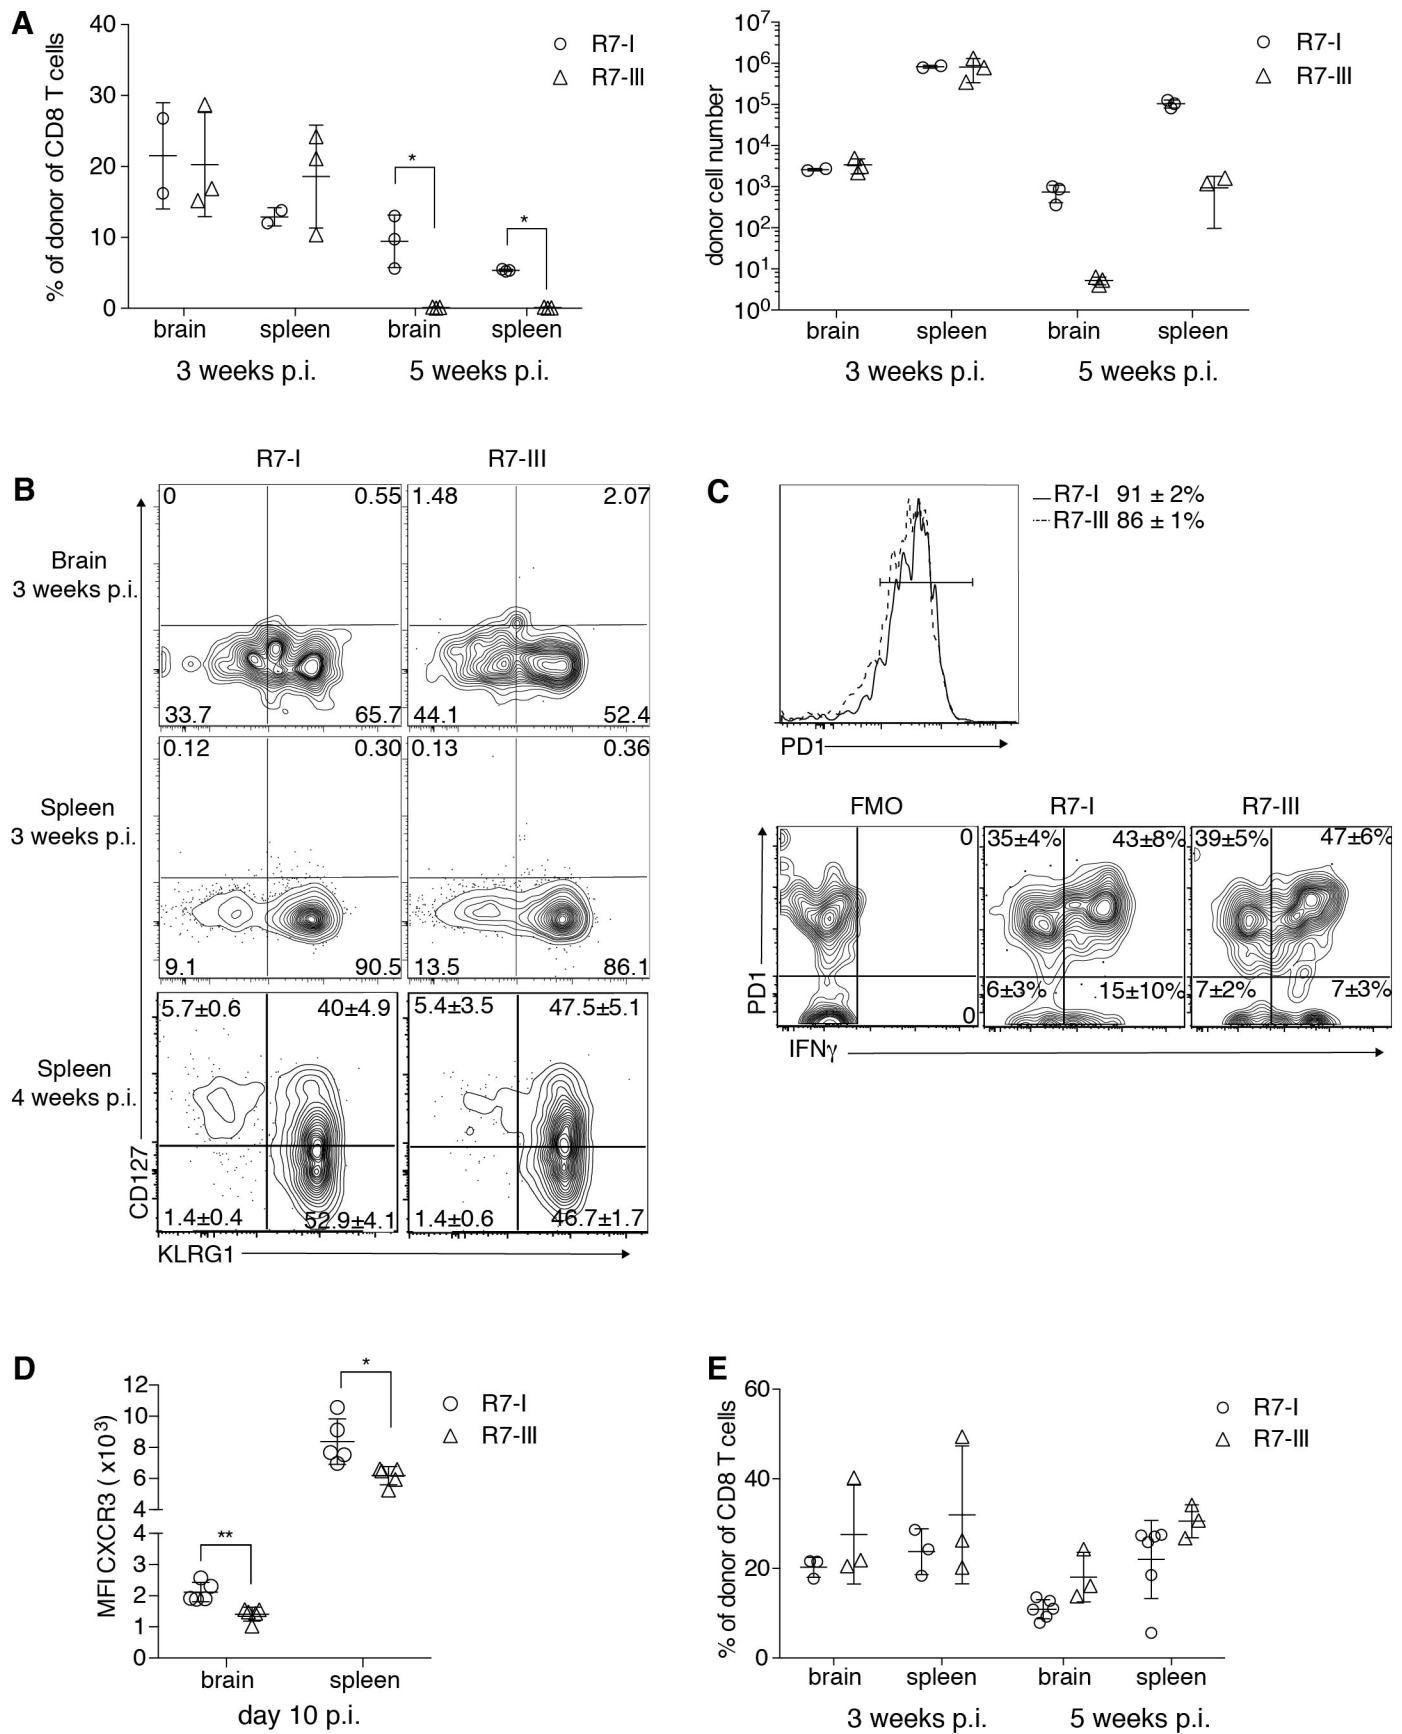

Figure 5

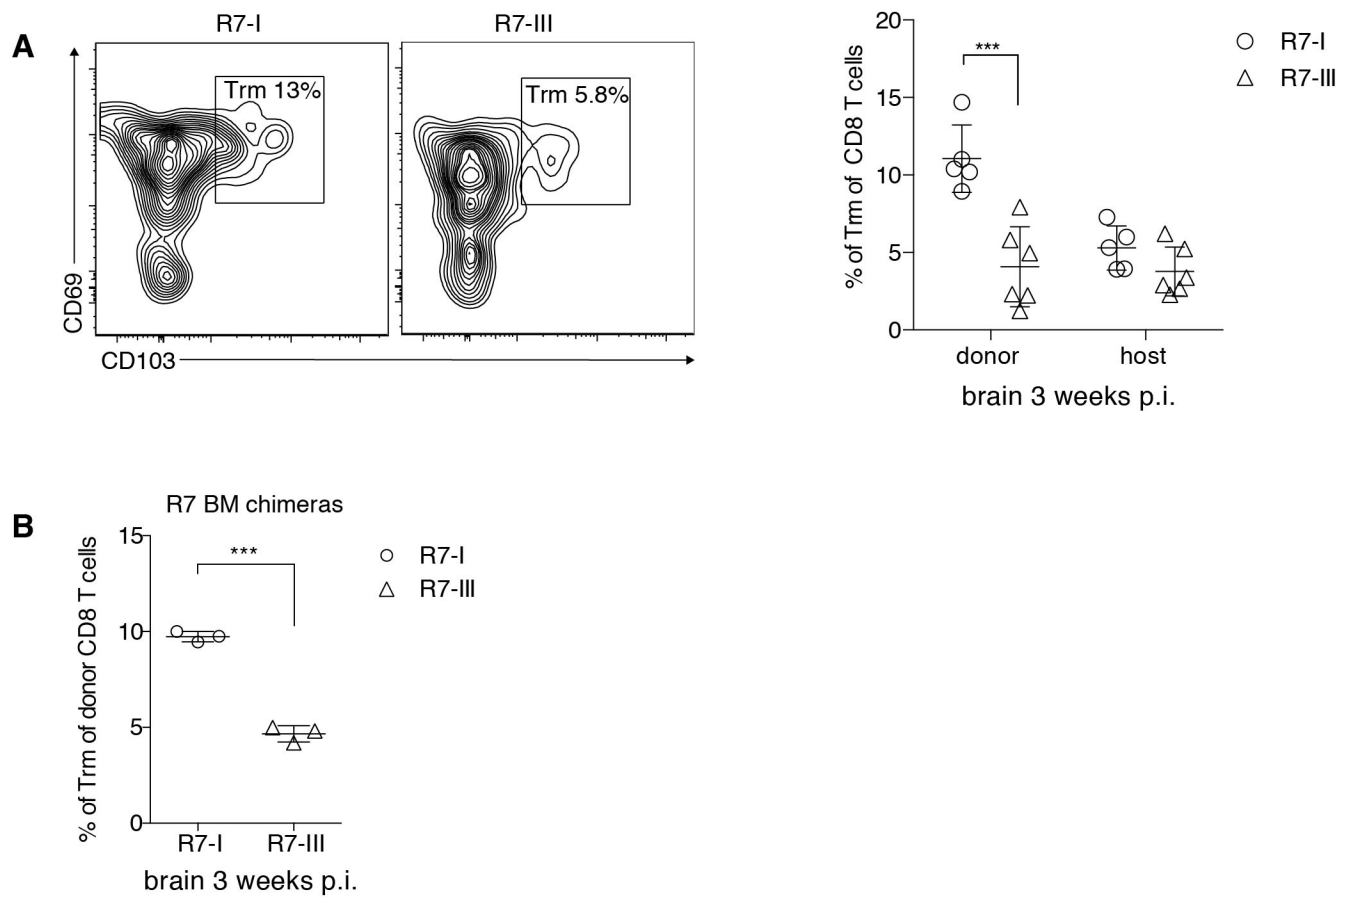

1 **Supplementary Information**

2

3 **Supplementary Figure 1. Quantification of donor R7 CD8 T cell populations at different**  
4 **time points post-infection.**

5 A) Percentages of donor R7 CD8 T cells in brain, spleen, mLN and non-draining LN at 2 weeks  
6 p.i. (representative of at least 5 experiments). B) Donor R7-III CD8 T cells 5 weeks p.i. in mLN  
7 and non-draining LN are present in lower percentages (left) and absolute numbers (right) than  
8 R7-I CD8 T cells (representative of at least 5 experiments).

## Supplementary Figure 1

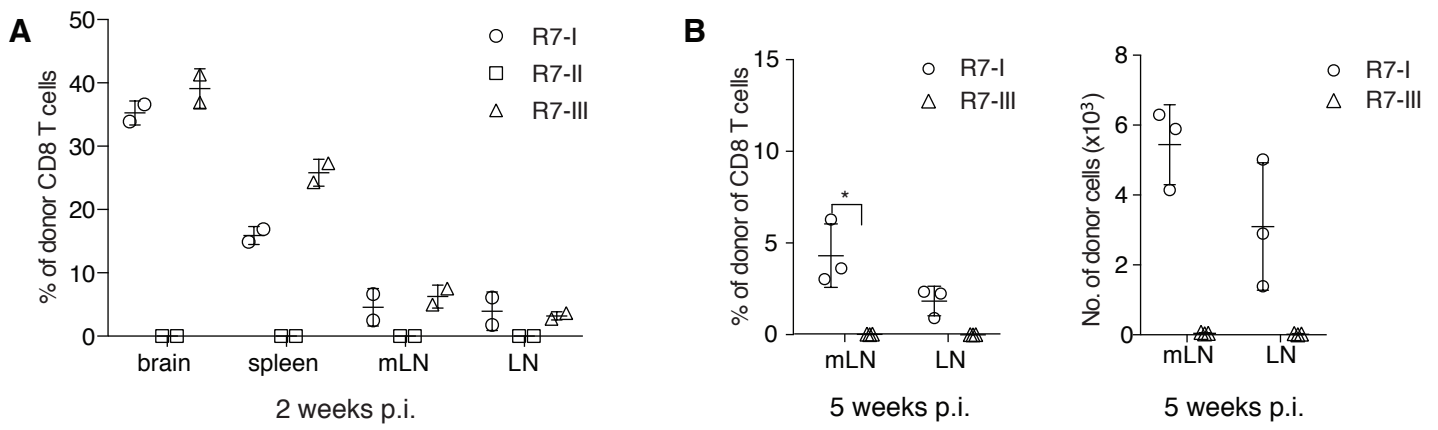

Source: https://www.biorxiv.org/content/10.1101/263152v1.full.pdf
